# Supplementary material for: A new green fluorimetric micelle complexation approach for reduction of the consumed solvent and quantification of avapritinib in biological fluids
Source: Royal Society of Chemistry journal article supplement (doi:10.1039/d4ra01198h), 2024-01-01
Supplement: d4ra01198h1.pdf [file d4ra01198h1.pdf]

## A New Green Fluorimetric Micelle Complexation Approach for Reduction of the Consumed Solvent and Quantification of Avapritinib in Biological Fluid

**Baher I. Salman<sup>1\*</sup>, Hany A. Batakoushy<sup>2</sup>, Roshdy E. Saraya<sup>3</sup>, Mohamed A. A. Abdel-Aal<sup>4</sup>, Adel Ehab Ibrahim<sup>5</sup>, Yasser F. Hassan<sup>1</sup>, Ahmed I. Hassan<sup>1</sup> and Ehab A.M. El-Shoura<sup>6</sup>**

<sup>1</sup> *Pharmaceutical Analytical Chemistry Department, Faculty of Pharmacy, Al-Azhar University, Assiut Branch, Assiut, 71524, Egypt; [bahersalman@azhar.edu.eg](mailto:bahersalman@azhar.edu.eg), [bahersalman2013@yahoo.com](mailto:bahersalman2013@yahoo.com)*

<sup>2</sup> *Pharmaceutical Analytical Chemistry Department, Faculty of Pharmacy, Menoufia University, Shebin Elkom, 32511, Egypt*

<sup>3</sup> *Pharmaceutical Analytical Chemistry Department, Faculty of Pharmacy, Port-Said University, Port Said 42511, Egypt.*

<sup>4</sup> *Department of Pharmaceutical Chemistry, Faculty of Pharmacy, Al-Azhar University, Assiut Branch, Assiut, 71524, Egypt.*

<sup>5</sup> *Natural and Medical Sciences Research Center, University of Nizwa, P.O. Box 33, Birkat Al Mauz, Nizwa 616, Oman.*

<sup>6</sup> *Department of Clinical Pharmacy, Faculty of Pharmacy, Al-Azhar University, Assiut Branch, Assiut, Egypt 71524*

**\*Corresponding author: Baher I. Salman, [bahersalman@azhar.edu.eg](mailto:bahersalman@azhar.edu.eg)**

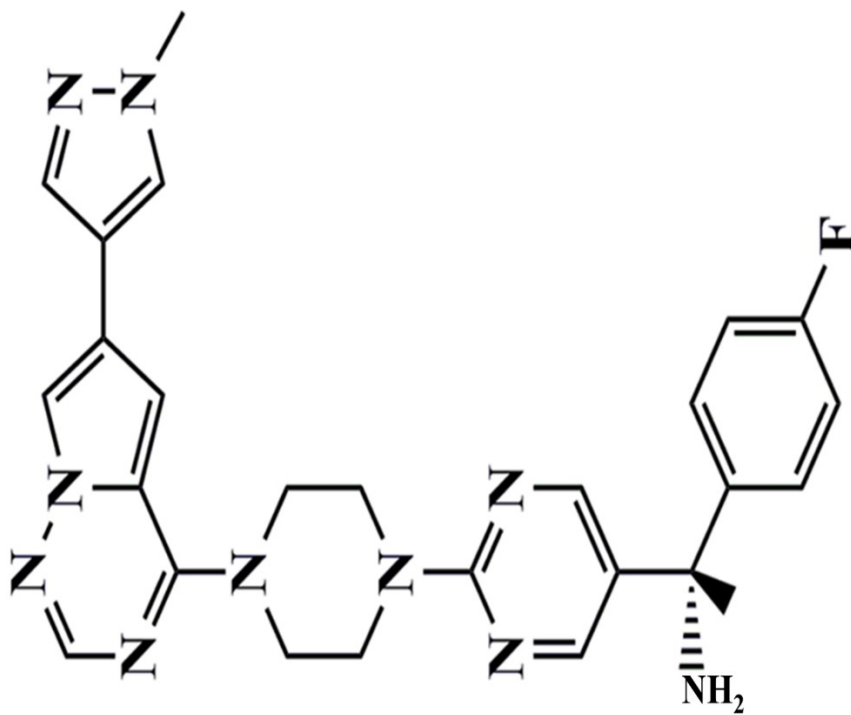

**Figure S1:** The Chemical structure of AVA.

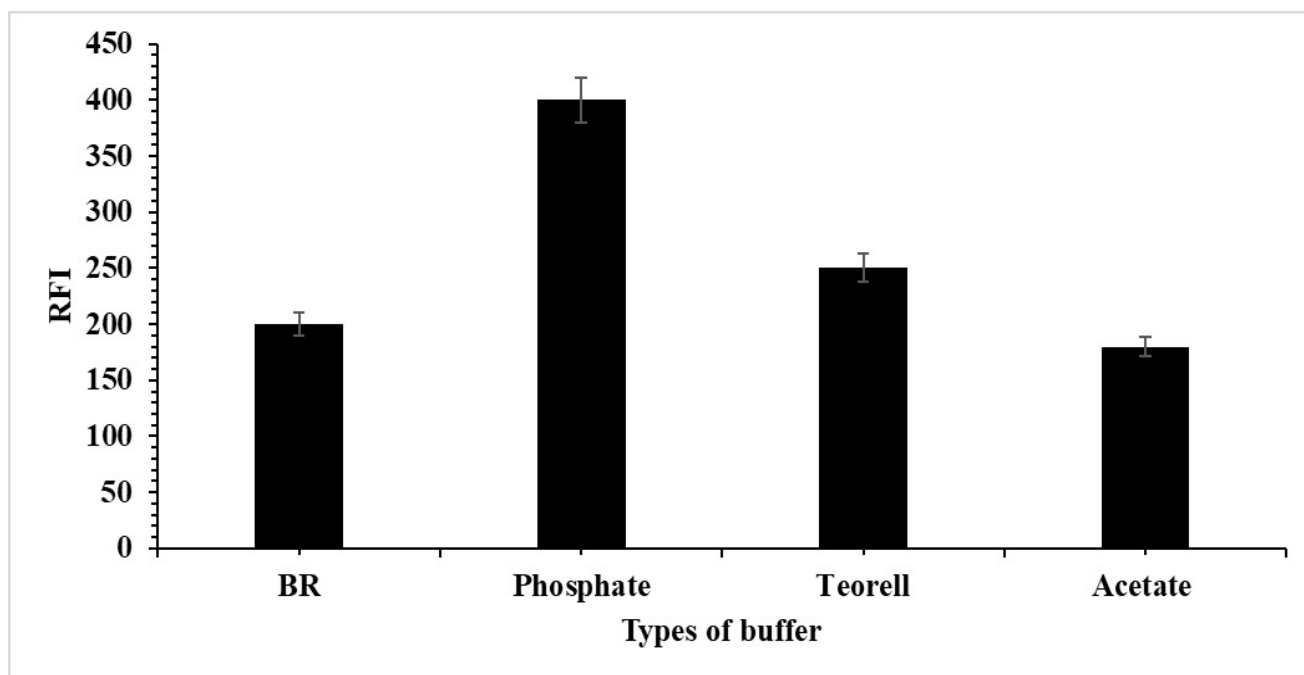

**Figure S2:** Effect of types of buffer for estimation of AVA ( $200 \text{ ng mL}^{-1}$ ) with 2 % SDS.

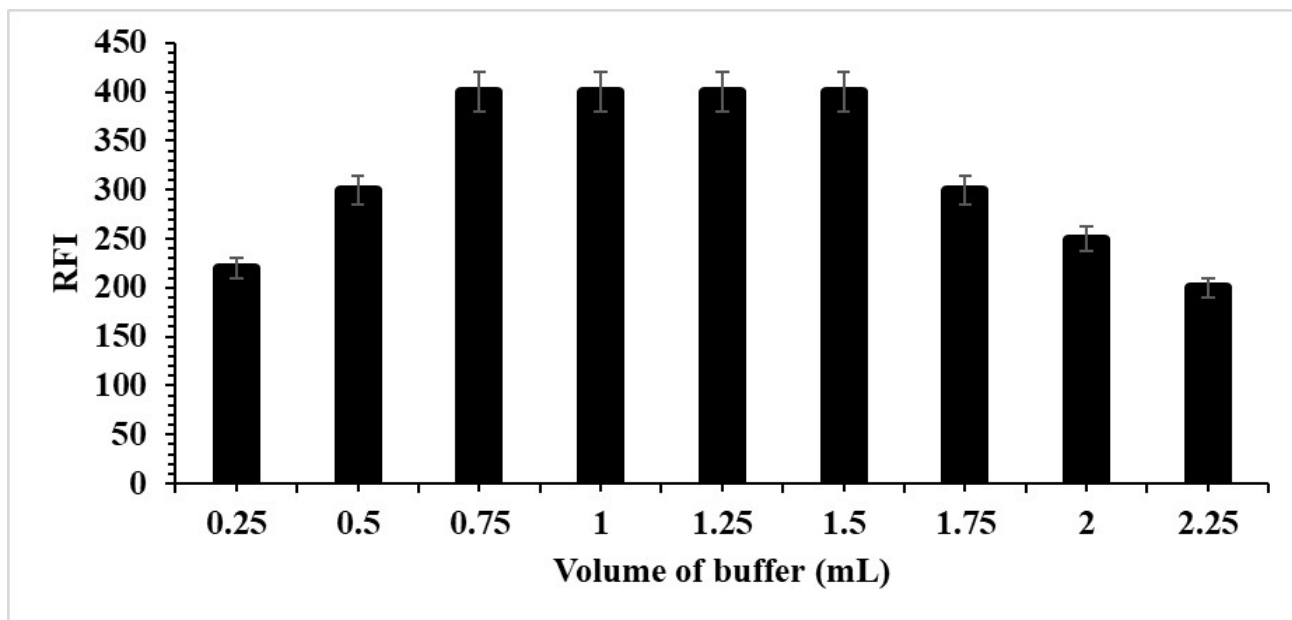

**Figure S3:** Effect of volume of phosphate buffers (pH 4) for estimation of AVA (200 ng mL<sup>-1</sup>) with 2 % SDS.

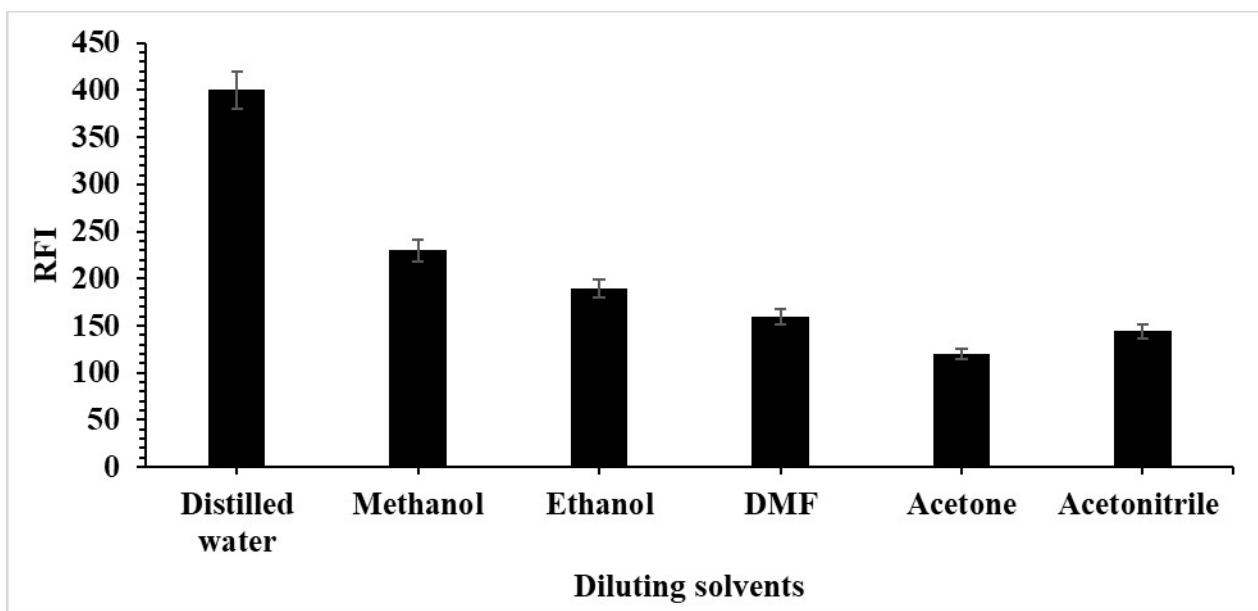

**Figure S4:** Effect of diluting solvents on RFI for estimation of AVA (200 ng mL<sup>-1</sup>) with 2% SDS.

**Table S1:** Applicability of the green method using content uniformity test.

| <b>Tablet No.</b>      | <b>% Labeled claim</b>  |
|------------------------|-------------------------|
|                        | Ayvakit® 100 mg tablets |
| 1                      | 100.22                  |
| 2                      | 101.30                  |
| 3                      | 101.00                  |
| 4                      | 100.55                  |
| 5                      | 101.78                  |
| 6                      | 101.90                  |
| 7                      | 99.74                   |
| 8                      | 99.98                   |
| 9                      | 102.19                  |
| 10                     | 100.12                  |
| Mean                   | 100.88                  |
| SD                     | 0.67                    |
| RSD                    | 0.66                    |
| Acceptance value (AV)* | 1.61                    |
| Max. allowed AV (L1)*  | 15                      |

**\* Acceptance value= 2.4 x SD**
